# Supplementary material for: Real-time PMIRRAS studies of in situ growth of C11Eg6OMe on gold and immersion effects
Source: Royal Society of Chemistry journal article supplement (doi:10.1039/b923691k), 2010-01-01
Supplement: b923691k.pdf [file b923691k.pdf]

# Real-time PMIRRAS studies of in situ growth of C<sub>11</sub>Eg<sub>6</sub>OMe on gold and immersion effects

## Supplementary Information

<sup>1</sup>Stefan Zorn, <sup>1,2</sup>Nathan Martin, <sup>1</sup>Alexander Gerlach, <sup>1,\*</sup>Frank Schreiber

<sup>1</sup> *Institute for Applied Physics, Eberhard-Karls University of Tübingen, Auf der Morgenstelle 10, 72076 Tübingen, Germany.*

<sup>2</sup> *Montana State University, Bozeman, Montana 59717, USA*

\*Corresponding author: frank.schreiber@uni-tuebingen.de

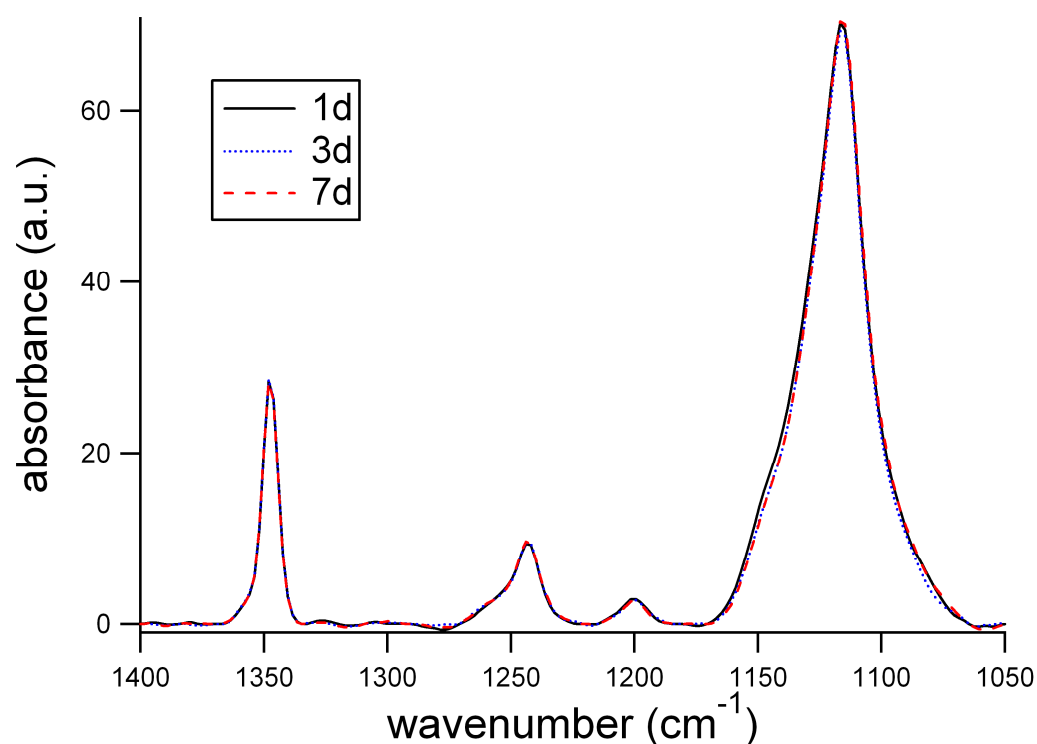

Spectra of Eg<sub>6</sub>OMe SAM after growth in aqueous environment; the times (1 day, 3 days, 7 days) are times after start of the growth. No significant changes are observed, providing good evidence for long-term stability under these conditions.
